# Supplementary material for: Health care costs associated with hepatitis C virus infection in First Nations populations in Ontario: a retrospective matched cohort study
Source: PubMed Central journal article supplement — CMAJ Open. 2021 Sep 28;9(3):E897–906. doi: 10.9778/cmajo.20200247 (PMC8486469; doi:10.9778/cmajo.20200247), 2021-09-28
Supplement: 2020-0247-1-at.pdf [file 2020-0247-1-at.pdf]

## Appendix 1. Administrative datasets held at ICES and used for this study

| Data Source                                                    | Timeframe                                            | Information                                                                                                                                                                                                                                    |
|----------------------------------------------------------------|------------------------------------------------------|------------------------------------------------------------------------------------------------------------------------------------------------------------------------------------------------------------------------------------------------|
| Registered Persons Database (RPDB)                             | 1991 to Dec 2017                                     | Contains information on all individuals insured by the Ontario Health Insurance Plan (OHIP) including date of birth, sex, date of death, age, and residence.                                                                                   |
| Discharge Abstract Database (DAD)                              | 1988 to Dec 2017                                     | Information on all inpatient hospital discharges                                                                                                                                                                                               |
| Ontario Health Insurance Plan (OHIP) Physician Claims database | 1991 to Dec 2017                                     | Records all physician services reimbursed by the Ontario Health Insurance Plan. Each claim contains a diagnosis code.                                                                                                                          |
| National Ambulatory Care Reporting System (NACRS) database     | 2000 to Dec 2017                                     | Contains information on all visits to emergency departments, and hospital outpatient clinics, including cancer and dialysis clinics                                                                                                            |
| Ontario Drug Benefit (ODB) database                            | 1991 to Dec 2017                                     | Documents prescriptions covered by the Ontario Ministry of Health and Long-Term Care. Includes all prescriptions filled by individuals aged 65 years and older, as well as by individuals on social assistance or in long-term care facilities |
| Ontario Cancer Registry (OCR)                                  | 1964 to Dec 2017                                     | Information on all Ontario residents who have been diagnosed with cancer. Including diagnosis date, type of cancer, admissions, discharge reports and pathology information.                                                                   |
| Office of the Registrar General Deaths register (ORGD)         | 1990 to Dec 2017                                     | Contains information regarding date and cause of death.                                                                                                                                                                                        |
| Ontario Mental Health Reporting System (OMHRS)                 | 2005 to Dec 2017                                     | Admissions to mental health–designated hospital beds.                                                                                                                                                                                          |
| Ontario HIV Database                                           | 1991 to Dec 2017                                     | ICES-derived administrative data registry of Ontario residents with diagnosed HIV infection.                                                                                                                                                   |
| Indian Register (IR)                                           | 1990 to 2015                                         | Includes demographic and administrative information for persons registered as status First Nations under the <i>Indian Act</i> , maintained by Indigenous Services Canada.                                                                     |
| Public Health Ontario (PHO) Laboratory Records                 | 1997 to Dec 2014 for HBV<br>1999 to Dec 2014 for HCV | Hepatitis B virus (HBV) and HCV testing records using laboratory data extracted from Public Health Ontario Laboratory’s former and current Laboratory Information Management Systems.                                                          |
| Same Day Surgery (SDS) Database                                | 1991 to Dec 2017                                     | Documents ambulatory care visits for outpatient surgery and procedures.                                                                                                                                                                        |
