# Supplementary material for: Health care costs associated with hepatitis C virus infection in First Nations populations in Ontario: a retrospective matched cohort study
Source: PubMed Central journal article supplement — CMAJ Open. 2021 Sep 28;9(3):E897–906. doi: 10.9778/cmajo.20200247 (PMC8486469; doi:10.9778/cmajo.20200247), 2021-09-28
Supplement: 2020-0247-2-at.pdf [file 2020-0247-2-at.pdf]

## Appendix 2. Detailed description of each characteristic

### *Region of Residence*

A annual flag was developed using postal codes associated with residence codes and census subdivisions unique to First Nations communities were identified from the RPDB, DAD, and NACRS to classify whether an individual resided within a First Nations community (“on-reserve”) or outside of a First Nations Community (“off-reserve”). This was then used to determine if an individual resided within or outside of a First Nations community during the year of matching date (phase entry or 6 months prior to death for terminal phase).<sup>1</sup> First Nations community status was only available until 2014, for any individual with a matching date from 2015 to 2017, their 2014 community status was carried forward.

### *HIV and HBV*

Cases of human immunodeficiency virus (HIV) and hepatitis B virus (HBV) were identified by searching diagnostic codes, service/procedure codes, the Ontario HIV database at ICES, and/or PHO testing records (Supplemental Table S1).

**Supplemental Table S1. Codes used to identify records of HIV or HBV.**

| Flag | Database Searched              | Codes Searched                                                                                                           |
|------|--------------------------------|--------------------------------------------------------------------------------------------------------------------------|
| HIV  | Ontario HIV Database           | Any record                                                                                                               |
|      | DAD, SDS, and NACRS            | ICD-9 diagnostic codes starting with: 042, 043, 044<br>ICD-10 diagnostic codes starting with: B20, B21, B22, B23, B24    |
| HBV  | DAD, SDS, and NACRS            | ICD-9 diagnostic codes: 070.2, 070.3<br>ICD-10 diagnostic codes: B16.0, B16.1, B16.2, B16.9, B17.0, B18.0, B18.1, Z22.50 |
|      | PHO Laboratory Testing Records | Any positive HBV antibody or confirmatory test                                                                           |

Abbreviations: DAD, Discharge Abstract Database; HIV, human immunodeficiency virus; HBV, hepatitis B virus; ICD, International Classification of Diseases; PHO, Public Health Ontario; NACRS, National Ambulatory Care Reporting System; SDS, same day surgery database.

### *Mental Health Conditions*

Records of mental health diagnoses, including substance abuse-related disorders, were reported by using stratified diagnostic groupings that categorize mental health and addictions-related diagnostic codes in the

administrative datasets (Supplemental Table S2). Diagnostic groups were developed by ICES and used as part of the Ontario Mental Health and Addiction Scorecard.<sup>2</sup> Conditions were identified from January 1, 2002 (the earliest date of the diagnostic grouping variable) to Dec 31, 2017 and flagged if the record occurred during the year prior to matching date. Diagnostic groups were supplemented with OHIP outpatient mental health diagnostic codes where there was sufficient detail to categorize the physician services claim. As alcohol can effect the progression of liver disease,<sup>3</sup> although already included in the substance-related and addiction disorder category, alcohol use disorder was also identified separately using related diagnostic codes.

**Supplemental Table S2. Codes used to identify records of mental health and addiction disorders.**

| <b>Diagnostic Group</b>                   | <b>ICD-9 codes (Used to search OMHRS)</b>                                                                           | <b>ICD-10 Codes (Used to search DAD and NACRS)</b>           | <b>OHIP Diagnostic Code</b> |
|-------------------------------------------|---------------------------------------------------------------------------------------------------------------------|--------------------------------------------------------------|-----------------------------|
| Substance-Related and Addiction Disorders | 291.x, 292.x, 303.x, 304.x, 305.x, 312.31, DSM Provisional=16                                                       | F10, F11, F12, F13, F14, F15, F16, F17, F18, F19, F55, F63.0 | 303, 304                    |
| Schizophrenia Spectrum Disorders          | 293.81, 293.82, 295.x, 297.x, all 298.x, DSM Provisional=2                                                          | F06.0, F06.1, F06.2, F20, F22-F29, F53.1                     | 295, 297, 298               |
| Depression Mood Disorder                  | 296.2x, 296.3x, 296.9x, 300.4x, 311.x, 625.4x, DSM Provisional=4                                                    | F32, F33, F34.1                                              | 311                         |
| Bipolar Mood Disorder                     | 296.0x, 296.4x, 296.5x, 296.6x, 296.7x, 296.8x, 301.13, DSM Provisional=3                                           | F30, F31, F34.0                                              | -                           |
| Anxiety Disorders                         | 293.84, 300, 300.0x, 300.2x, 309.21, 313.23. DSM Provisional=5                                                      | F06.4, F40, F41, F93.0, F93.1, F93.2, F94.0                  | 300                         |
| Trauma/Stressor-related Disorders         | 308.3x, 309, 309.0x, 309.24, 309.28, 309.3x, 309.4x, 309.81, 309.89, 309.9x, 313.89. DSM Provisional=7              | F43, F94.1, F94.2                                            | 309                         |
| Alcohol Use Disorder                      | 291.0, 291.1, 291.3, 291.5, 291.81, 291.89, 291.90, 292.2, 303.0, 303.9, 305.0<br>Additionally, for OMHRS: 291, 303 | F10                                                          | 303                         |

Notes: x represents all subcategories within the respective diagnosis code. Provisional represents broader provisional diagnoses categories found in OMHRS based on DSM-IV and DSM-V codes. Diagnostic group codes (with the exception of alcohol use disorder) were adapted from the Ontario Mental Health and Addiction Scorecard.

Abbreviations: DAD, Discharge Abstract Database; DSM, Diagnostic and Statistical Manual of Mental Disorders; ICD, International Classification of Diseases; NACRS, National Ambulatory Care Reporting System; OHIP, Ontario Health Insurance Plan; OMHRS, Ontario Mental Health Reporting System.

### ***Outpatient Prescription Drugs***

Outpatient prescription drugs likely related to HCV infection, were captured from the Ontario Drug Benefit (ODB) database, which contains information about claims covered by the Ontario Drug Benefit plan for eligible individuals.<sup>4</sup> Eligible individuals include Ontario residents who are aged 65 and older, or living in long-term care facilities, or who have a high drug cost relative to their income.<sup>4</sup> Any record of claims specific to direct-acting antivirals (DAA), interferon, ribavirin, and interferon-based combination therapies were captured up until December 31, 2017 and categorized using their respective drug identification numbers (DIN) (Supplemental Table S3).

**Supplemental Table S3. HCV-related treatment regimens and their associated identification numbers searched in the Ontario Drug Benefit database.**

| <b>Treatment</b>                    | <b>Drug Identification Numbers</b>                                                                                                                                                                                                                                                      |
|-------------------------------------|-----------------------------------------------------------------------------------------------------------------------------------------------------------------------------------------------------------------------------------------------------------------------------------------|
| Ribavirin                           | 02246030, 02246026, 02246027, 02246028, 02246029, 02254581, 02254603, 02254638, 02254646, 02239730, 02241159, 09852417, 09853260, 02439212                                                                                                                                              |
| Direct Acting Antivirals            | 02371464, 02371472, 02436027, 02432226, 02425890, 02425904, 02416441, 02418355, 02371553, 02444747, 02452294, 09857396, 02370816, 02451131, 02456370, 02467542, 02444755, 02447711, 02371448, 02371456                                                                                  |
| Interferon                          | 02239832, 02223384, 02223392, 02223406, 02231651, 00889067, 02223414, 02238674, 02238675, 09853995, 09854045, 09854053, 00705896, 00705918, 00705926, 02240693, 02240695, 01911988, 01911996, 01912003, 00812471, 00812498, 00812501, 02217015, 02217031, 02217058, 02217066, 02019914, |
| Peginterferon                       | 02240694, 02242966, 02242967, 02242968, 02242969, 02248077, 02248078                                                                                                                                                                                                                    |
| Peginterferon-Ribavirin Combination | 09857505, 02253429, 02253410, 09857418, 09857420, 09857421, 09857421, 09857506, 09857509, 02254573                                                                                                                                                                                      |

### ***Multimorbidity***

Multimorbidity was captured and scored using the Johns Hopkins ACG System, Aggregated Diagnosis Groups (ADG),<sup>5</sup> based on one year prior to matching date. The number of individuals within each ADG category was reported. Also, individuals were categorized as having 0 to 3, 4 to 7, 8 to 10, and 11+ categories, corresponding to an increasing degree of multimorbidity.

## ***Decompensated Cirrhosis and Hepatocellular Carcinoma***

Validated algorithms were used to detect cases of decompensated cirrhosis and hepatocellular carcinoma within Ontario healthcare administrative data (Supplemental Tables S4 and S5).<sup>6</sup>

**Supplemental Table S4. Codes used to identify cases of decompensated cirrhosis.**

| <b>Databases Searched</b> | <b>Codes Searched</b>                                                                                                                                                                                                                                            |
|---------------------------|------------------------------------------------------------------------------------------------------------------------------------------------------------------------------------------------------------------------------------------------------------------|
| OHIP                      | Procedure billing codes: J057, Z591                                                                                                                                                                                                                              |
| DAD, SDS and NACRS        | CCP codes: 1006, 6691<br>CCI codes: 1NA13BAFA, 1NA13BAX7, 1NA13BABD, 1KQ76GPNR, 1OT52HA<br>ICD-9 diagnostic codes: 572.2, 572.3, 572.4, 456.0, 456.2, 782.4, 789.5<br>ICD-10 diagnostic codes: K76.6, K76.7, R17, K72.1, K72.9, I85.0, I98.20, I98.3, I86.4, R18 |
| ORGD                      | ICD-9 codes for cause of death: 571.5, 571.2, 572.2, 572.3, 572.4, 572.8, 456.0<br>ICD-10 codes for cause of death: K72.1, K72.9, K70.3, K70.4, K71.7, K74, K74.6, K76.6, K76.7, I85, I98.2, I98.3, I86.4                                                        |

Notes: The algorithm consisted of one physician visit code for cirrhosis and any one of the hospital diagnosis, procedure, or cause of death codes.

Abbreviations: DAD, Discharge Abstract Database; CCI, Canadian Classification of Health Interventions; CCP, Classification of Procedures; ICD, International Classification of Diseases; NACRS, National Ambulatory Care Reporting System; ORGD, Office of the Registrar General Deaths register; SDS, same day surgery database.

**Supplemental Table S5. Codes used to identify cases of hepatocellular carcinoma.**

| <b>Databases Searched</b> | <b>Codes Searched</b>                                                                 |
|---------------------------|---------------------------------------------------------------------------------------|
| DAD, SDS, and NACRS       | ICD-9 diagnostic code: 155.0<br>ICD-10 diagnostic codes: C22.9, C22.0, 81703, 81803   |
| ORGD                      | ICD-9 code for cause of death: 155.0<br>ICD-10 codes for cause of death: 81703, 81803 |
| OCR                       | Topography: C22.0<br>Morphology: 81703, 81723, 81733, 81743, 81753, 81803             |

Notes: The algorithm consisted of a diagnosis in the Ontario Cancer Registry, a hospital diagnostic code, or a cause of death code. Diagnosis in the Ontario Cancer Registry (OCR) used the ICD-O coding system and consisted of one topography code and a 5-digit morphology code.

Abbreviations: DAD, Discharge Abstract Database; ICD, International Classification of Diseases; ICD-O, International Classification of Diseases- Oncology; NACRS, National Ambulatory Care Reporting System; OCR, Ontario Cancer Registry; ORGD, Office of the Registrar General Deaths register; SDS, same day surgery database.

## *Liver Transplant*

**Supplemental Table S6. Codes used to identify cases of liver transplant.**

| <b>Databases Searched</b> | <b>Codes Searched</b>                                                                                                                                                               |
|---------------------------|-------------------------------------------------------------------------------------------------------------------------------------------------------------------------------------|
| DAD, SDS, and NACRS       | ICD-9 diagnostic codes: V42.7, 996.82<br>ICD-10 diagnostic codes: Z94.4, T86.40, T86.41, T86.42, T86.43, T86.49, T86.9<br>CCI codes: 1OA85LAXXK, 1OA85VCXXK, 1OA85WLXXJ, 1OA85WLXXK |

Notes: The algorithm consisted of the presence of any of the diagnostic or procedure codes.

Abbreviations: DAD, Discharge Abstract Database; CCI, Canadian Classification of Health Interventions; ICD, International Classification of Diseases; NACRS, National Ambulatory Care Reporting System; SDS, same day surgery database.

## *Resource Categories*

The ‘other services’ category was used to capture OHIP non-physician claims, assisted device program, rehabilitation services, home care, complex continuing care, and long-term care services. OHIP non-physician claims include services provided by a health care practitioner who is not a medical doctor.

Examples include services provided by optometrists, physiotherapists and chiropractors. OHIP only partially covers the costs of these services or covers them for specific populations or circumstances; e.g., for those aged 65 years and older.

Most physicians in Ontario bill OHIP fee-for-service. Those on alternative funding programs are encouraged to “shadow-bill”, that is, submit a claim for services provided, for which they are paid a small percentage of the usual fee.<sup>7</sup>

## *References*

1. Slater M, Green ME, Shah B, Khan S, Jones CR, Sutherland R, et al. First Nations people with diabetes in Ontario: methods for a longitudinal population-based cohort study. *CMAJ Open*. 2019 Oct 1;7(4):E680–8.
2. MHASEF Research Team. Mental Health and Addictions System Performance in Ontario: A Baseline Scorecard. [Internet]. Toronto, Ontario: Institute for Clinical Evaluative Sciences; 2018 [cited 2019 Dec 17]. Available from: <https://www.ices.on.ca/Publications/Atlases-and-Reports/2018/MHASEF>
3. Ostapowicz G, Watson KJ, Locarnini SA, Desmond PV. Role of alcohol in the progression of liver disease caused by hepatitis C virus infection. *Hepatology*. 1998;27(6):1730–5.
4. Chu A, Han L, Roifman I, Lee DS, Green ME, Jacklin K, et al. Trends in cardiovascular care and event rates among First Nations and other people with diabetes in Ontario, Canada, 1996–2015. *CMAJ*. 2019 Nov 25;191(47):E1291.

Appendix 2, as supplied by the authors. Appendix to: Mendlowitz A, Bremner KE, Walker JD, et al. Health care costs associated with hepatitis C virus infection in First Nations populations in Ontario: a retrospective matched cohort study. *CMAJ Open* 2021. DOI:10.9778/cmajo.20200247. Copyright © 2021 The Author(s) or their employer(s). To receive this resource in an accessible format, please contact us at [cmajgroup.cmajca](mailto:cmajgroup.cmajca).

5. Johns Hopkins ACG® System [Internet]. Johns Hopkins ACG® System. [cited 2019 Feb 7]. Available from: <https://www.hopkinsacg.org/>
6. Lapointe-Shaw L, Georgie F, Carlone D, Cerocchi O, Chung H, Dewit Y, et al. Identifying cirrhosis, decompensated cirrhosis and hepatocellular carcinoma in health administrative data: A validation study. PLOS ONE. 2018 Aug 22;13(8):e0201120.
7. Wodchis WP, Bushmeneva K, Nikitovic M, McKillop I. Guidelines on Person-Level Costing Using Administrative Databases in Ontario. 2013 May [cited 2020 Jul 14]; Available from: <https://tspace.library.utoronto.ca/handle/1807/87373>
