# Supplementary material for: Health care costs associated with hepatitis C virus infection in First Nations populations in Ontario: a retrospective matched cohort study
Source: PubMed Central journal article supplement — CMAJ Open. 2021 Sep 28;9(3):E897–906. doi: 10.9778/cmajo.20200247 (PMC8486469; doi:10.9778/cmajo.20200247), 2021-09-28
Supplement: 2020-0247-4-at.pdf [file 2020-0247-4-at.pdf]

#### **Appendix 4. Phase allocation and case-control matching outcomes**

Liver disease constituted the earliest record of hepatocellular carcinoma, decompensated cirrhosis, or liver transplant. \*Only those in each pool with information regarding whether the individual resided within or outside a First Nations community at the respective matching dates were included.

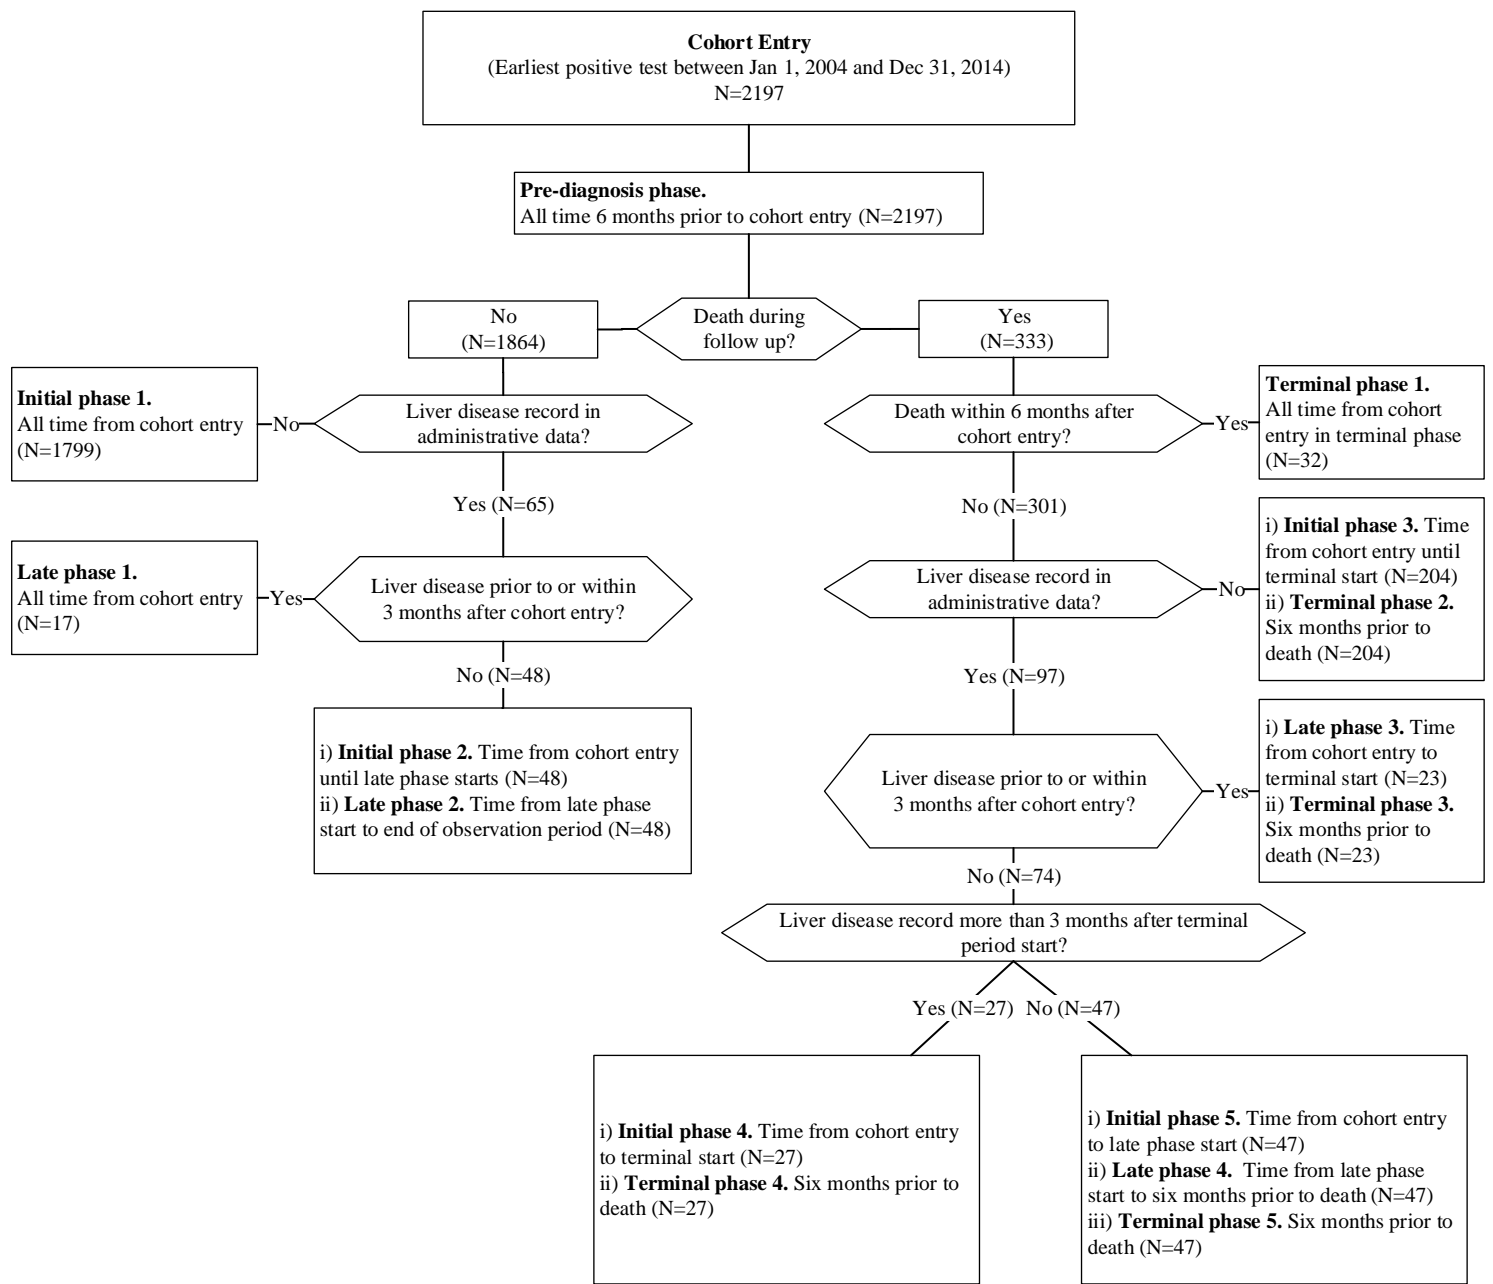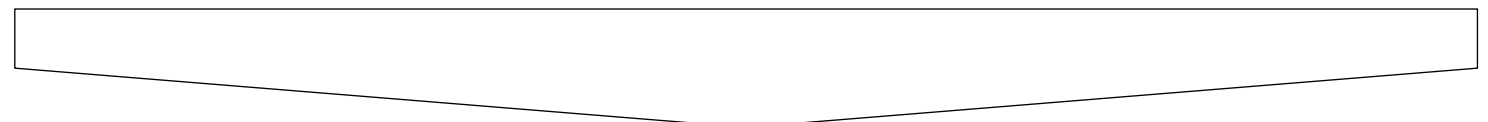

**Pre-diagnosis phase count:**  
All: 2197  
**Total prior to matching:** 2197  
**Total after matching:** 2,096\*

**Pre-diagnosis Controls:**  
Control Pool: 97,488  
Matched Controls: 3,916\*

**Initial phase count:**  
Initial phase 1: 1799  
Initial phase 2: 48  
Initial phase 3: 204  
Initial phase 4: 27  
Initial phase 5: 47  
**Total prior to matching:** 2125  
**Total after matching:** 2,077\*

**Initial Phase Controls:**  
Control Pool: 100,726  
Matched Controls: 3,875\*

**Late phase count:**  
Late phase 1: 17  
Late phase 2: 48  
Late phase 3: 23  
Late phase 4: 47  
**Total prior to matching:** 135  
**Total after matching:** 130\*

**Late Phase Controls:**  
Control Pool: 100,977  
Matched Controls: 249\*

**Terminal phase count:**  
Terminal phase 1: 32  
Terminal phase 2: 204  
Terminal phase 3: 23  
Terminal phase 4: 27  
Terminal phase 5: 47  
**Total prior to matching:** 333  
**Total after matching:** 297\*

**Terminal Phase Controls:**  
Control Pool: 7,044  
Matched Controls: 545\*
