# Supplementary material for: Health care costs associated with hepatitis C virus infection in First Nations populations in Ontario: a retrospective matched cohort study
Source: PubMed Central journal article supplement — CMAJ Open. 2021 Sep 28;9(3):E897–906. doi: 10.9778/cmajo.20200247 (PMC8486469; doi:10.9778/cmajo.20200247), 2021-09-28
Supplement: 2020-0247-5-at.pdf [file 2020-0247-5-at.pdf]

## Appendix 5. Additional Matching and Costing Results

**Supplemental Table S7. ADG categories of HCV cases and matched controls.**

|                                                        | Phase of Care |                  |               |                  |            |                  |             |                  |
|--------------------------------------------------------|---------------|------------------|---------------|------------------|------------|------------------|-------------|------------------|
|                                                        | Pre-Diagnosis |                  | Initial       |                  | Late       |                  | Terminal    |                  |
|                                                        | Cases         | Matched Controls | Cases         | Matched Controls | Cases      | Matched Controls | Cases       | Matched Controls |
| Total, N                                               | 2,096         | 3,916            | 2,077         | 3,875            | 130        | 249              | 297         | 545              |
| <b>ADG Category<sup>‡</sup>, N (%)</b>                 |               |                  |               |                  |            |                  |             |                  |
| ADG1: Time Limited: Minor                              | 349 (16.7%)   | 614 (15.7%)      | 399 (19.2%)   | 714 (18.4%)      | 16 (12.3%) | 28 (11.2%)       | 61 (20.5%)  | 119 (21.8%)      |
| ADG2: Time Limited: Minor-Primary Infections           | 592 (28.2%)   | 1,033 (26.4%)    | 703 (33.8%)   | 1,179 (30.4%)    | 49 (37.7%) | 94 (37.8%)       | 129 (43.4%) | 243 (44.6%)      |
| ADG3: Time Limited: Major                              | 84 (4.0%)     | 143 (3.7%)       | 139 (6.7%)    | 223 (5.8%)       | 16 (12.3%) | 32 (12.9%)       | 62 (20.9%)  | 120 (22.0%)      |
| ADG4: Time Limited: Major-Primary Infections           | 280 (13.4%)   | 435 (11.1%)      | 491 (23.6%)   | 819 (21.1%)      | 61 (46.9%) | 106 (42.6%)      | 130 (43.8%) | 227 (41.7%)      |
| ADG5: Allergies                                        | 35 (1.7%)     | 61 (1.6%)        | 41 (2.0%)     | 70 (1.8%)        | <=5        | <=5              | <=5         | 12 (2.2%)        |
| ADG6: Asthma                                           | 96 (4.6%)     | 146 (3.7%)       | 101 (4.9%)    | 172 (4.4%)       | <=5        | <=5              | 23 (7.7%)   | 52 (9.5%)        |
| ADG7: Likely to Recur: Discrete                        | 526 (25.1%)   | 974 (24.9%)      | 583 (28.1%)   | 1,076 (27.8%)    | 53 (40.8%) | 115 (46.2%)      | 110 (37.0%) | 201 (36.9%)      |
| ADG8: Likely to Recur: Discrete-Infections             | 239 (11.4%)   | 433 (11.1%)      | 264 (12.7%)   | 410 (10.6%)      | 21 (16.2%) | 31 (12.4%)       | 51 (17.2%)  | 91 (16.7%)       |
| ADG9: Likely to Recur: Progressive                     | 43 (2.1%)     | 57 (1.5%)        | 72 (3.5%)     | 104 (2.7%)       | 12 (9.2%)  | 30 (12.0%)       | 48 (16.2%)  | 99 (18.2%)       |
| ADG10: Chronic Medical: Stable                         | 473 (22.6%)   | 821 (21.0%)      | 513 (24.7%)   | 945 (24.4%)      | 60 (46.2%) | 105 (42.2%)      | 159 (53.5%) | 307 (56.3%)      |
| ADG11: Chronic Medical: Unstable                       | 208 (9.9%)    | 310 (7.9%)       | 272 (13.1%)   | 487 (12.6%)      | 71 (54.6%) | 126 (50.6%)      | 139 (46.8%) | 271 (49.7%)      |
| ADG12: Chronic Specialty: Stable-Orthopedic            | 46 (2.2%)     | 70 (1.8%)        | 50 (2.4%)     | 86 (2.2%)        | <=5        | 7 (2.8%)         | 10 (3.4%)   | 22 (4.0%)        |
| ADG13: Chronic Specialty: Stable-Ear,Nose,Throat       | 17 (0.8%)     | 21 (0.5%)        | 19 (0.9%)     | 26 (0.7%)        | <=5        | 0                | <=5         | <=5              |
| ADG14: Chronic Specialty: Stable-Eye                   | 27 (1.3%)     | 50 (1.3%)        | 22 (1.1%)     | 27 (0.7%)        | <=5        | <=5              | 9 (3.0%)    | 6 (1.1%)         |
| ADG16: Chronic Specialty: Unstable-Orthopedic          | 48 (2.3%)     | 88 (2.2%)        | 45 (2.2%)     | 80 (2.1%)        | <=5        | 11 (4.4%)        | 6 (2.0%)    | 12 (2.2%)        |
| ADG18: Chronic Specialty: Unstable-Eye                 | 25 (1.2%)     | 39 (1.0%)        | 28 (1.3%)     | 44 (1.1%)        | <=5        | 7 (2.8%)         | 14 (4.7%)   | 22 (4.0%)        |
| ADG20: Dermatologic                                    | 104 (5.0%)    | 154 (3.9%)       | 98 (4.7%)     | 176 (4.5%)       | 11 (8.5%)  | 19 (7.6%)        | 16 (5.4%)   | 33 (6.1%)        |
| ADG21: Injuries/Adverse Effects: Minor                 | 634 (30.2%)   | 1,076 (27.5%)    | 680 (32.7%)   | 1,210 (31.2%)    | 39 (30.0%) | 68 (27.3%)       | 116 (39.1%) | 193 (35.4%)      |
| ADG22: Injuries/Adverse Effects: Major                 | 582 (27.8%)   | 970 (24.8%)      | 678 (32.6%)   | 1,169 (30.2%)    | 35 (26.9%) | 73 (29.3%)       | 126 (42.4%) | 232 (42.6%)      |
| ADG23: Psychosocial: Time Limited, Minor               | 196 (9.4%)    | 319 (8.1%)       | 237 (11.4%)   | 409 (10.6%)      | 15 (11.5%) | 25 (10.0%)       | 40 (13.5%)  | 58 (10.6%)       |
| ADG24: Psychosocial: Recurrent or Persistent, Stable   | 780 (37.2%)   | 1,314 (33.6%)    | 924 (44.5%)   | 1,629 (42.0%)    | 45 (34.6%) | 84 (33.7%)       | 127 (42.8%) | 242 (44.4%)      |
| ADG25: Psychosocial: Recurrent or Persistent, Unstable | 719 (34.3%)   | 1,216 (31.1%)    | 1,066 (51.3%) | 1,934 (49.9%)    | 53 (40.8%) | 97 (39.0%)       | 137 (46.1%) | 233 (42.8%)      |

Appendix 5, as supplied by the authors. Appendix to: Mendlowitz A, Bremner KE, Walker JD, et al. Health care costs associated with hepatitis C virus infection in First Nations populations in Ontario: a retrospective matched cohort study. *CMAJ Open* 2021. DOI:10.9778/cmajo.20200247. Copyright © 2021 The Author(s) or their employer(s). To receive this resource in an accessible format, please contact us at [cmajgroup.cmaj.ca](mailto:cmajgroup.cmaj.ca).

|                                  |             |               |             |               |            |             |             |             |
|----------------------------------|-------------|---------------|-------------|---------------|------------|-------------|-------------|-------------|
| ADG26: Signs/Symptoms: Minor     | 581 (27.7%) | 1,027 (26.2%) | 740 (35.6%) | 1,291 (33.3%) | 71 (54.6%) | 138 (55.4%) | 156 (52.5%) | 287 (52.7%) |
| ADG27: Signs/Symptoms: Uncertain | 838 (40.0%) | 1,406 (35.9%) | 998 (48.1%) | 1,821 (47.0%) | 65 (50.0%) | 124 (49.8%) | 184 (62.0%) | 343 (62.9%) |
| ADG28: Signs/Symptoms: Major     | 373 (17.8%) | 634 (16.2%)   | 498 (24.0%) | 789 (20.4%)   | 57 (43.8%) | 107 (43.0%) | 132 (44.4%) | 244 (44.8%) |
| ADG29: Discretionary             | 209 (10.0%) | 396 (10.1%)   | 246 (11.8%) | 439 (11.3%)   | 25 (19.2%) | 58 (23.3%)  | 52 (17.5%)  | 99 (18.2%)  |
| ADG30: See and Reassure          | 20 (1.0%)   | 34 (0.9%)     | 26 (1.3%)   | 54 (1.4%)     | <=5        | <=5         | 7 (2.4%)    | 13 (2.4%)   |
| ADG31: Prevention/Administrative | 562 (26.8%) | 972 (24.8%)   | 699 (33.7%) | 1,232 (31.8%) | 45 (34.6%) | 87 (34.9%)  | 118 (39.7%) | 234 (42.9%) |
| ADG32: Malignancy†               | 73 (3.5%)   | 99 (2.5%)     | 84 (4.0%)   | 119 (3.1%)    | 12 (9.2%)  | 18 (7.2%)   | 51 (17.2%)  | 113 (20.7%) |
| ADG33: Pregnancy                 | 103 (4.9%)  | 209 (5.3%)    | 135 (6.5%)  | 269 (6.9%)    | <=5        | <=5         | <=5         | <=5         |
| ADG34: Dental                    | 129 (6.2%)  | 221 (5.6%)    | 141 (6.8%)  | 244 (6.3%)    | 7 (5.4%)   | 11 (4.4%)   | 15 (5.1%)   | 28 (5.1%)   |

Notes: ADG15 and ADG19 are no longer used. ADG17 (Chronic Specialty: Unstable-Ear, Nose, Throat) was not found in any case or control.

<=5 cannot be reported or able to be calculated to comply with ICES privacy rules.

†Not used for late phase matching algorithm

‡During the year before matching date

Abbreviations: ADG, aggregated diagnosis group.

**Supplemental Table S8. Direct healthcare costs per 30 days for cases and controls by cost category stratified by community status**

|                                                              | Phase of Care, mean cost per 30 days (% of total) |                  |              |                  |               |                  |               |                  |
|--------------------------------------------------------------|---------------------------------------------------|------------------|--------------|------------------|---------------|------------------|---------------|------------------|
|                                                              | Pre-diagnosis                                     |                  | Initial      |                  | Late          |                  | Terminal      |                  |
|                                                              | Cases                                             | Matched Controls | Cases        | Matched Controls | Cases         | Matched Controls | Cases         | Matched Controls |
| <i>Case Resides within First Nations Community at Match</i>  |                                                   |                  |              |                  |               |                  |               |                  |
| <b>Number of Individuals, N</b>                              | 382                                               | 733              | 382          | 722              | 18            | 36               | 38            | 72               |
| <b>Resource Category, \$ (% of total)</b>                    |                                                   |                  |              |                  |               |                  |               |                  |
| Outpatient Visits                                            | 60 (10.7%)                                        | 16 (8.1%)        | 104 (14.2%)  | 54 (13.0%)       | 304 (17.5%)   | 446 (40.9%)      | 676 (13.0%)   | 694 (9.8%)       |
| Physician Services                                           | 113 (20.0%)                                       | 57 (28.7%)       | 148 (20.2%)  | 91 (21.8%)       | 253 (14.6%)   | 166 (15.3%)      | 732 (14.1%)   | 804 (11.4%)      |
| Emergency Room Visits                                        | 62 (11.0%)                                        | 19 (9.5%)        | 45 (6.1%)    | 27 (6.4%)        | 106 (6.1%)    | 32 (2.9%)        | 214 (4.1%)    | 217 (3.1%)       |
| Same Day Surgery                                             | 7 (1.2%)                                          | 6 (3.0%)         | 9 (1.2%)     | 9 (2.1%)         | 15 (0.9%)     | 22 (2.0%)        | 33 (0.6%)     | 22 (0.3%)        |
| Inpatient Care                                               | 263 (46.9%)                                       | 77 (38.7%)       | 288 (39.3%)  | 155 (37.3%)      | 663 (38.2%)   | 199 (18.3%)      | 3064 (59.1%)  | 4747 (67.3%)     |
| Outpatient Prescription                                      | 15 (2.6%)                                         | 11 (5.6%)        | 95 (12.9%)   | 37 (8.8%)        | 315 (18.2%)   | 150 (13.7%)      | 202 (3.9%)    | 127 (1.8%)       |
| Lab Tests/Services                                           | 18 (3.1%)                                         | 8 (4.2%)         | 15 (2.0%)    | 8 (1.9%)         | 13 (0.7%)     | 11 (1.0%)        | 7 (0.1%)      | 8 (0.1%)         |
| Other Services*                                              | 24 (4.3%)                                         | 4 (2.2%)         | 31 (4.2%)    | 35 (8.5%)        | 65 (3.8%)     | 63 (5.8%)        | 257 (5.0%)    | 431 (6.1%)       |
| <b>Total</b>                                                 | 562 (100.0%)                                      | 199 (100.0%)     | 733 (100.0%) | 416 (100.0%)     | 1735 (100.0%) | 1089 (100.0%)    | 5185 (100.0%) | 7050 (100.0%)    |
| <i>Case Resides Outside First Nations Community at Match</i> |                                                   |                  |              |                  |               |                  |               |                  |
| <b>Number of Individuals, N</b>                              | 1714                                              | 3183             | 1695         | 3153             | 112           | 213              | 259           | 473              |
| <b>Resource Category, \$ (% of total)</b>                    |                                                   |                  |              |                  |               |                  |               |                  |
| Outpatient Visits                                            | 62 (9.5%)                                         | 35 (11.2%)       | 86 (9.5%)    | 74 (14.3%)       | 214 (7.3%)    | 206 (20.5%)      | 665 (7.0%)    | 745 (9.1%)       |
| Physician Services                                           | 133 (20.4%)                                       | 81 (26.1%)       | 172 (19.0%)  | 114 (22.1%)      | 430 (14.5%)   | 148 (14.7%)      | 1104 (11.7%)  | 886 (10.8%)      |
| Emergency Room Visits                                        | 80 (12.2%)                                        | 29 (9.3%)        | 57 (6.3%)    | 43 (8.3%)        | 184 (6.2%)    | 62 (6.1%)        | 255 (2.7%)    | 279 (3.4%)       |
| Same Day Surgery                                             | 9 (1.3%)                                          | 10 (3.1%)        | 9 (1.0%)     | 10 (1.9%)        | 36 (1.2%)     | 15 (1.5%)        | 14 (0.2%)     | 32 (0.4%)        |
| Inpatient Care                                               | 250 (38.2%)                                       | 108 (35.0%)      | 334 (36.8%)  | 176 (34.2%)      | 1411 (47.7%)  | 354 (35.3%)      | 6349 (67.3%)  | 5339 (65.1%)     |
| Outpatient Prescription                                      | 37 (5.7%)                                         | 20 (6.4%)        | 162 (17.9%)  | 50 (9.6%)        | 420 (14.2%)   | 98 (9.7%)        | 217 (2.3%)    | 212 (2.6%)       |
| Lab Tests/Services                                           | 30 (4.6%)                                         | 11 (3.6%)        | 17 (1.9%)    | 10 (1.9%)        | 22 (0.8%)     | 10 (1.0%)        | 18 (0.2%)     | 12 (0.2%)        |
| Other Services*                                              | 53 (8.1%)                                         | 16 (5.3%)        | 70 (7.7%)    | 40 (7.7%)        | 238 (8.1%)    | 111 (11.1%)      | 818 (8.7%)    | 697 (8.5%)       |
| <b>Total</b>                                                 | 654 (100.0%)                                      | 310 (100.0%)     | 907 (100.0%) | 516 (100.0%)     | 2955 (100.0%) | 1003 (100.0%)    | 9440 (100.0%) | 8203 (100.0%)    |

Note: Each cost was standardized to a measure per 30 days by dividing each patient-level cost by each person's time in phase. All costs are rounded to the nearest dollar and expressed in 2018 Canadian dollars.

\*Contains costs related to the assisted device program, non-physician healthcare professional services, rehabilitation, home care, complex continuing care and long-term care services.

**Supplemental Table S9. Net costs of care per 30 days by cost category and phase stratified by cases that reside within and outside of First Nations communities at matching date.**

|                                       | Phase of care, mean net cost (95% CI) per 30 days |                                    |                                |                                    |                                |                                    |                                |                                    |
|---------------------------------------|---------------------------------------------------|------------------------------------|--------------------------------|------------------------------------|--------------------------------|------------------------------------|--------------------------------|------------------------------------|
|                                       | Pre-diagnosis                                     |                                    | Initial                        |                                    | Late                           |                                    | Terminal                       |                                    |
|                                       | Within First Nations Community                    | Outside of First Nations Community | Within First Nations Community | Outside of First Nations Community | Within First Nations Community | Outside of First Nations Community | Within First Nations Community | Outside of First Nations Community |
| Number of Cases                       | 382                                               | 1714                               | 382                            | 1695                               | 18                             | 112                                | 38                             | 259                                |
| Number of Controls                    | 733                                               | 3183                               | 722                            | 3153                               | 36                             | 213                                | 72                             | 473                                |
| <b>Resource Category, \$ (95% CI)</b> |                                                   |                                    |                                |                                    |                                |                                    |                                |                                    |
| Outpatient Visits                     | 44 (10,102)                                       | 27 (8,50)                          | 50 (-22,139)                   | 12 (-17,42)                        | -142 (-757,465)                | 9 (-166,177)                       | -12 (-568,635)                 | -75 (-355,204)                     |
| Physician Services                    | 55 (29,87)                                        | 52 (40,65)                         | 57 (33,81)                     | 58 (47,71)                         | 87 (-64,262)                   | 282 (205,371)                      | -71 (-439,318)                 | 219 (-31,493)                      |
| Emergency Room Visits                 | 43 (32,55)                                        | 51 (43,59)                         | 18 (10,26)                     | 14 (9,20)                          | 74 (-9,185)                    | 122 (70,181)                       | -3 (-94,93)                    | -25 (-80,32)                       |
| Same Day Surgery                      | 1 (-4,7)                                          | -1 (-5,3)                          | 0 (-3,3)                       | -1 (-2,0)                          | -7 (-27,14)                    | 21 (4,39)                          | 11 (-17,42)                    | -18 (-38,-2)                       |
| Inpatient Care                        | 187 (68,317)                                      | 141 (87,195)                       | 133 (-8,270)                   | 157 (93,228)                       | 464 (-80,1190)                 | 1056 (671,1534)                    | -1676 (-4267,858)              | 1040 (-715,2964)                   |
| Outpatient Prescription               | 4 (-4,11)                                         | 17 (11,24)                         | 58 (32,87)                     | 112 (97,127)                       | 166 (-44,371)                  | 322 (161,495)                      | 75 (-67,264)                   | 5 (-101,121)                       |
| Lab Tests/Services                    | 9 (5,14)                                          | 19 (16,23)                         | 7 (3,10)                       | 8 (6,9)                            | 2 (-7,10)                      | 13 (3,23)                          | -1 (-6,5)                      | 6 (0,12)                           |
| Other                                 | 20 (0,56)                                         | 37 (5,77)                          | -5 (-32,21)                    | 30 (-1,69)                         | 2 (-130,157)                   | 126 (13,263)                       | -175 (-523,171)                | 122 (-236,469)                     |
| Total Cost                            | 363 (202,539)                                     | 344 (258,427)                      | 318 (85,549)                   | 391 (300,493)                      | 645 (-618,2163)                | 1949 (1280,2708)                   | -1844 (-5182,1419)             | 1289 (-892,3515)                   |

Notes: Each cost is rounded to the nearest dollar and expressed in 2018 Canadian dollars. Net costs were estimated for cases to controls using clustered generalized estimating equations (GEE) with each cost category as the dependent variable and HCV status as the independent variable. For each GEE analysis of each resource category, a gamma distribution and log link were used. Confidence intervals were generated using the percentile method sampling from 1,000 clustered bootstrap replications.

**Supplemental Table S10. Direct healthcare costs per 30 days for cases and controls by cost category stratified by sex.**

|                                           | Phase of Care, mean cost per 30 days (% of total) |                  |              |                  |               |                  |               |                  |
|-------------------------------------------|---------------------------------------------------|------------------|--------------|------------------|---------------|------------------|---------------|------------------|
|                                           | Pre-diagnosis                                     |                  | Initial      |                  | Late          |                  | Terminal      |                  |
|                                           | Cases                                             | Matched Controls | Cases        | Matched Controls | Cases         | Matched Controls | Cases         | Matched Controls |
| <i>Males</i>                              |                                                   |                  |              |                  |               |                  |               |                  |
| <b>Number of Individuals, N</b>           | 1152                                              | 2188             | 1132         | 2113             | 88            | 169              | 181           | 340              |
| <b>Resource Category, \$ (% of total)</b> |                                                   |                  |              |                  |               |                  |               |                  |
| Outpatient Visits                         | 66 (11.2%)                                        | 30 (11.4%)       | 101 (11.9%)  | 87 (16.7%)       | 276 (10.0%)   | 312 (27.1%)      | 721 (8.0%)    | 679 (9.3%)       |
| Physician Services                        | 115 (19.5%)                                       | 64 (24.0%)       | 148 (17.4%)  | 98 (18.7%)       | 410 (14.9%)   | 157 (13.6%)      | 1064 (11.8%)  | 802 (10.9%)      |
| Emergency Room Visits                     | 71 (12.0%)                                        | 23 (8.6%)        | 56 (6.6%)    | 39 (7.5%)        | 188 (6.8%)    | 68 (5.9%)        | 252 (2.8%)    | 257 (3.5%)       |
| Same Day Surgery                          | 9 (1.5%)                                          | 6 (2.3%)         | 8 (1.0%)     | 9 (1.8%)         | 41 (1.5%)     | 17 (1.5%)        | 18 (0.2%)     | 33 (0.4%)        |
| Inpatient Care                            | 234 (39.8%)                                       | 100 (37.6%)      | 304 (35.9%)  | 190 (36.2%)      | 1226 (44.6%)  | 391 (33.9%)      | 5904 (65.3%)  | 4683 (63.8%)     |
| Outpatient Prescription                   | 28 (4.8%)                                         | 17 (6.6%)        | 131 (15.5%)  | 41 (7.9%)        | 378 (13.8%)   | 81 (7.0%)        | 220 (2.4%)    | 220 (3.0%)       |
| Lab Tests/Services                        | 25 (4.3%)                                         | 8 (3.0%)         | 15 (1.8%)    | 8 (1.5%)         | 22 (0.8%)     | 10 (0.9%)        | 18 (0.2%)     | 12 (0.2%)        |
| Other Services*                           | 41 (7.0%)                                         | 17 (6.5%)        | 84 (9.9%)    | 51 (9.8%)        | 205 (7.5%)    | 116 (10.1%)      | 846 (9.4%)    | 651 (8.9%)       |
| <b>Total</b>                              | 589 (100.0%)                                      | 265 (100.0%)     | 847 (100.0%) | 524 (100.0%)     | 2747 (100.0%) | 1152 (100.0%)    | 9042 (100.0%) | 7335 (100.0%)    |
| <i>Females</i>                            |                                                   |                  |              |                  |               |                  |               |                  |
| <b>Number of Individuals, N</b>           | 944                                               | 1728             | 945          | 1762             | 42            | 80               | 116           | 205              |
| <b>Resource Category, \$ (% of total)</b> |                                                   |                  |              |                  |               |                  |               |                  |
| Outpatient Visits                         | 56 (8.1%)                                         | 32 (10.1%)       | 75 (8.2%)    | 49 (10.5%)       | 124 (4.3%)    | 89 (12.2%)       | 583 (6.7%)    | 837 (9.1%)       |
| Physician Services                        | 147 (21.2%)                                       | 93 (29.1%)       | 192 (21.2%)  | 124 (26.8%)      | 394 (13.8%)   | 137 (18.9%)      | 1044 (12.0%)  | 998 (10.8%)      |
| Emergency Room Visits                     | 84 (12.0%)                                        | 32 (10.0%)       | 54 (6.0%)    | 40 (8.6%)        | 143 (5.0%)    | 36 (4.9%)        | 246 (2.8%)    | 295 (3.2%)       |
| Same Day Surgery                          | 8 (1.2%)                                          | 12 (3.9%)        | 10 (1.1%)    | 10 (2.2%)        | 16 (0.5%)     | 14 (1.9%)        | 15 (0.2%)     | 27 (0.3%)        |
| Inpatient Care                            | 274 (39.4%)                                       | 106 (33.3%)      | 351 (38.6%)  | 152 (32.6%)      | 1477 (51.5%)  | 207 (28.5%)      | 5968 (68.9%)  | 6220 (67.3%)     |
| Outpatient Prescription                   | 39 (5.6%)                                         | 19 (6.0%)        | 171 (18.9%)  | 55 (11.7%)       | 463 (16.1%)   | 156 (21.4%)      | 207 (2.4%)    | 169 (1.8%)       |
| Lab Tests/Services                        | 32 (4.5%)                                         | 14 (4.4%)        | 19 (2.1%)    | 11 (2.4%)        | 18 (0.6%)     | 9 (1.2%)         | 15 (0.2%)     | 11 (0.1%)        |
| Other Services*                           | 56 (8.0%)                                         | 10 (3.2%)        | 36 (4.0%)    | 24 (5.2%)        | 233 (8.1%)    | 80 (11.0%)       | 591 (6.8%)    | 680 (7.4%)       |
| <b>Total</b>                              | 695 (100.0%)                                      | 318 (100.0%)     | 908 (100.0%) | 465 (100.0%)     | 2868 (100.0%) | 727 (100.0%)     | 8668 (100.0%) | 9237 (100.0%)    |

Notes: Each cost was standardized to a measure per 30 days by dividing each patient-level cost by each person's time in phase. All costs are rounded to the nearest dollar and expressed in 2018 Canadian dollars.

\*Contains costs related to the assisted device program, non-physician healthcare professional services, rehabilitation, home care, complex continuing care and long-term care services.

**Supplemental Table S11. Net costs of care per 30 days by cost category and phase stratified by sex.**

|                                       | Phase of care, mean net cost (95% CI) per 30 days |               |               |               |                 |                  |                  |                   |
|---------------------------------------|---------------------------------------------------|---------------|---------------|---------------|-----------------|------------------|------------------|-------------------|
|                                       | Pre-diagnosis                                     |               | Initial       |               | Late            |                  | Terminal         |                   |
|                                       | Male                                              | Female        | Male          | Female        | Male            | Female           | Male             | Female            |
| Number of cases                       | 1152                                              | 944           | 1132          | 945           | 88              | 42               | 181              | 116               |
| Number of controls                    | 2188                                              | 1728          | 2113          | 1762          | 169             | 80               | 340              | 205               |
| <b>Resource Category, \$ (95% CI)</b> |                                                   |               |               |               |                 |                  |                  |                   |
| Outpatient Visits                     | 36 (10,64)                                        | 24 (0,55)     | 14 (-29,62)   | 26 (-2,57)    | -36 (-291,193)  | 36 (-58,139)     | 45 (-251,348)    | -245 (-631,199)   |
| Physician Services                    | 51 (37,65)                                        | 54 (37,74)    | 50 (38,62)    | 67 (50,90)    | 253 (168,355)   | 257 (162,370)    | 263 (-31,609)    | 51 (-288,493)     |
| Emergency Room Visits                 | 48 (40,57)                                        | 52 (42,62)    | 16 (9,23)     | 14 (7,20)     | 120 (60,197)    | 108 (64,157)     | -5 (-65,56)      | -49 (-145,42)     |
| Same Day Surgery                      | 2 (-2,7)                                          | -4 (-11,2)    | -1 (-3,0)     | -1 (-2,1)     | 24 (4,47)       | 2 (-7,11)        | -15 (-42,5)      | -12 (-31,6)       |
| Inpatient Care                        | 134 (64,209)                                      | 168 (106,240) | 114 (29,201)  | 199 (115,287) | 835 (429,1331)  | 1268 (693,1895)  | 1248 (-818,3418) | -220 (-2739,2462) |
| Outpatient Prescription               | 11 (4,18)                                         | 20 (12,27)    | 90 (73,108)   | 117 (96,139)  | 297 (146,470)   | 308 (18,623)     | 0 (-138,155)     | 38 (-56,140)      |
| Lab Tests/Services                    | 17 (14,21)                                        | 17 (12,22)    | 7 (5,9)       | 8 (6,10)      | 12 (3,24)       | 9 (3,19)         | 5 (-1,12)        | 4 (-4,13)         |
| Other                                 | 24 (-7,68)                                        | 45 (6,103)    | 33 (-11,90)   | 12 (-5,29)    | 89 (-15,228)    | 150 (-43,362)    | 196 (-227,636)   | -89 (-432,303)    |
| Total Cost                            | 324 (219,429)                                     | 376 (280,487) | 323 (186,461) | 443 (321,560) | 1594 (844,2431) | 2130 (1275,3031) | 1745 (-639,4460) | -498 (-3563,2832) |

Notes: Each cost is rounded to the nearest dollar and expressed in 2018 Canadian dollars. Net costs were estimated for cases to controls using clustered generalized estimating equations (GEE) with each cost category as the dependent variable and HCV status as the independent variable. For each GEE analysis of each resource category, a gamma distribution and log link were used. Confidence intervals were generated using the percentile method sampling from 1,000 clustered bootstrap replications.
