# Supplementary material for: Health care costs associated with hepatitis C virus infection in First Nations populations in Ontario: a retrospective matched cohort study
Source: PubMed Central journal article supplement — CMAJ Open. 2021 Sep 28;9(3):E897–906. doi: 10.9778/cmajo.20200247 (PMC8486469; doi:10.9778/cmajo.20200247), 2021-09-28
Supplement: open-2020-0247-original-submission.pdf [file open-2020-0247-original-submission.pdf]

**Editor's note**

The original submission of this manuscript contained data from the First Nations people who are members of communities in the Kenora Chiefs Advisory. However, because of an institutional error in retrieving data usage permissions from the Kenora Chiefs Advisory, the authors were required to exclude these data from their analyses. As such, the original submission is not available as supplementary material. Please note that these data represented a small subset of the study data and their exclusion did not change the overall results of the paper.

Dr. Diane Kelsall  
Editor, *CMAJ Open*
